# Supplementary material
Source: PubMed Central journal article supplement (PMC1415283)

SUPPLEMENTAL FIGURE 1

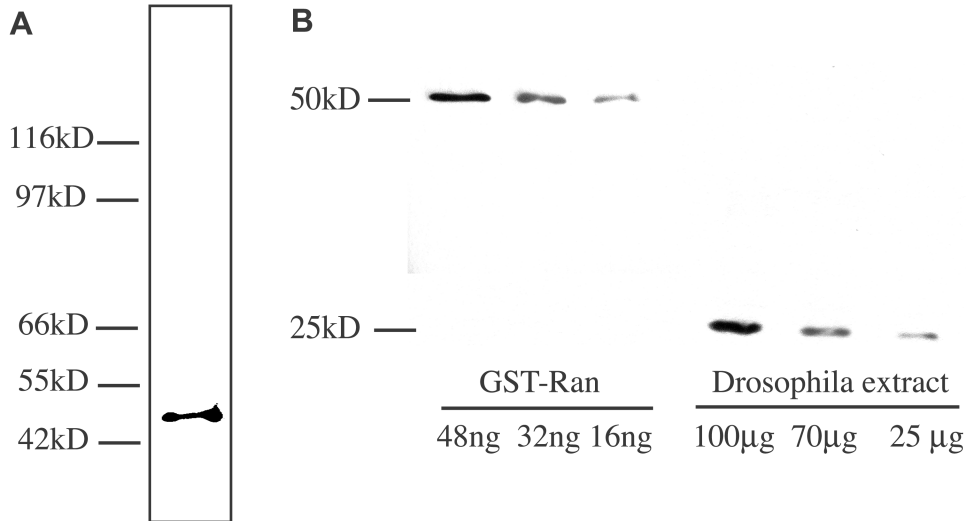

Supplement: mbc_E05-10-0991_1.pdf [file mbc_E05-10-0991_1.pdf]
